# Supplementary material for: Delineating a role for the mitochondrial permeability transition pore in diabetic kidney disease by targeting cyclophilin D
Source: Oxford University Press journal article supplement (doi:10.1042/cs20190787), 2020-01-01
Supplement: cs-2019-0787_supp.pdf [file cs-2019-0787_supp.pdf]

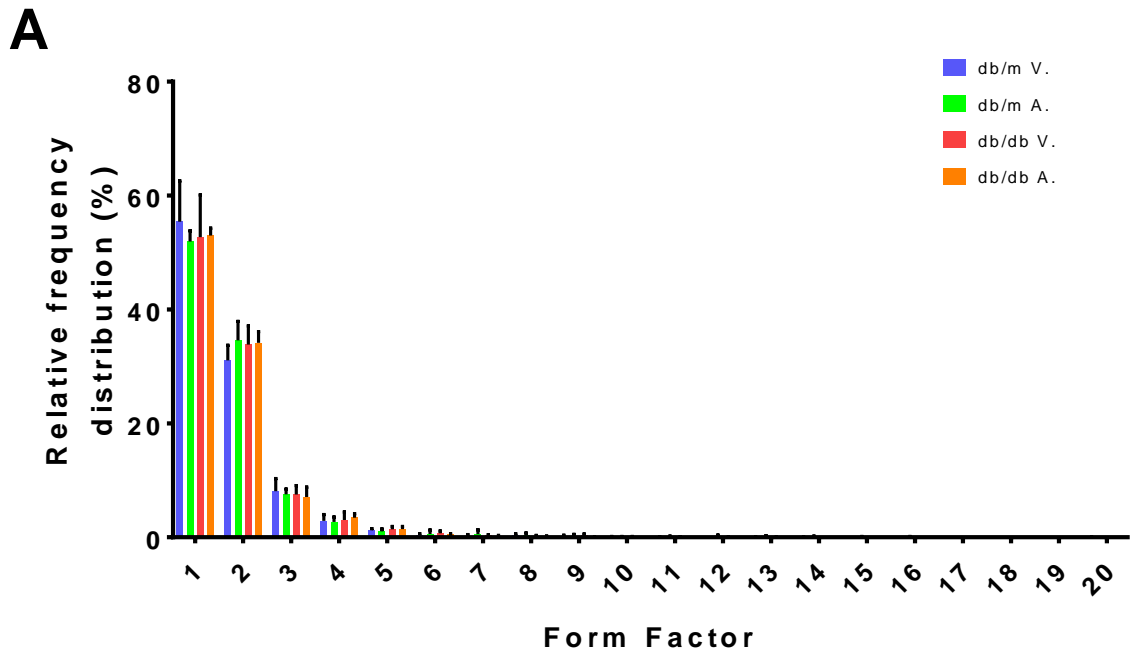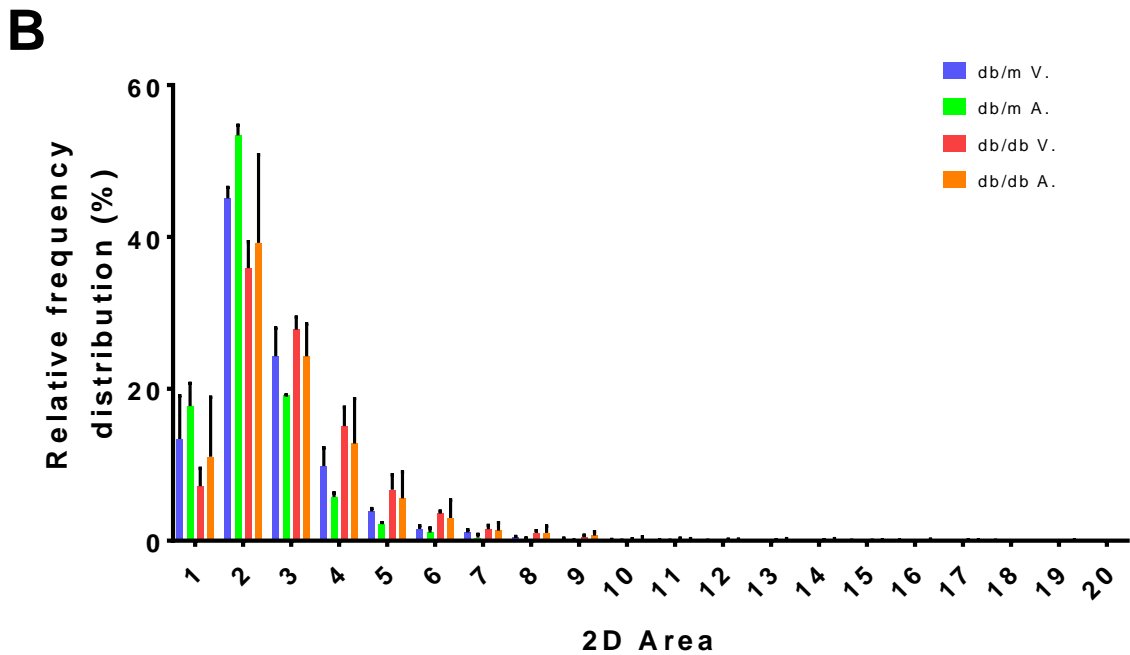

**Supplementary Figure 1. Frequency Distribution Data for analysis of Electron Microscopy 2D sections of PTEC mitochondria.** (A) Shape descriptors of 'Form Factor'. (B) Frequency Distribution of % Area mitochondria in 2D cytosol volume. Frequency data was divided into 20 bins of equal size. Graphs show mean and SD of n=3 per group.

**Supplementary Table 1. List of Primers sequences used**

| Gene<br>( <i>Mus musculus</i> )                        | Forward 5' – 3'            | Reverse 5' – 3'           | Genebank accession |
|--------------------------------------------------------|----------------------------|---------------------------|--------------------|
| Ppif <sup>‡</sup><br>(Cyclophilin F,<br>Cyclophilin D) | TGGCTCTCAGTTCTTTATCTGC     | ACATCCATGCCCTCTTTGAC      | NM_134084.1        |
| Cyt c                                                  | CATCTTGGTTTCAAGCCCAGA      | CTGCCCAGGCCAAAATTGC       | JF919281.1         |
| ATP synthase,<br>F1- $\alpha$                          | TGTCCGCTTACATTCCAACAAA     | CAGGGCGGATGCCTTTATAG      | BC020417           |
| Fibronectin                                            | ACATGGCTTTAGGCGGACAA       | ACATTCGGCAGGTATGGTCTTG    | M10905             |
| TGF- $\beta$                                           | GCAGTGGCTGAACCAAGGA        | GCAGTGAGCGCTGAATCGA       | NM_011577          |
| F4/80                                                  | GGTACAGTCATCTCCCTGGTATGTCT | GGTTCTGAACAGCACGACACA     | X93328             |
| Casp 3                                                 | GACGGTCCTCCTGGTCTTTG       | GTGGCTGGCTGCATTGC         | NM_009810          |
| Casp 8                                                 | CAACTTCCTAGACTGCAACCG      | TCCAACCTCGCTCACTTCTTCT    | NM_009812.2        |
| Casp 9                                                 | TCCTGGTACATCGAGACCTTG      | AAGTCCCTTTCGCAGAAACAG     | NM_015733.5        |
| Casp 12                                                | AGACAGAGTTAATGCAGTTTGCT    | TTCACCCACAGATTCCTTCC      | NM_009808.4        |
| Col I                                                  | GACTGGAAGAGCGGAGAGTACTG    | CCTTGATGGCGTCCAGGTT       | NM_007742          |
| $\alpha$ -SMA                                          | GACGCTGAAGTATCCGATAGAACA   | GGCCACACGAAGCTCGTTAT      | NM_007392          |
| CTGF                                                   | GCTGCCTACCGACTGGAAGA       | CTTAGAACAGGCGCTCCACTCT    | BC006783           |
| Mief1                                                  | GCTTCGCTACACTGATCGAGACT    | CTCAAGCTTCTGATTTTCTGAAT   | NM_178719          |
| Pink1                                                  | AGAAAACCAAGCGGTGTCT        | GGAAGCCCTGCCAGCAT         | NM_026880          |
| Opa1 <sup>□</sup>                                      | ATACTGGGATCTGCTGTTGG       | AAGTCAGGCACAATCCACTT      | NM_001199177.1     |
| Ucp-2                                                  | CCGTAATGCCATTGTCAACTGT     | GGCTTTCAGGAGAGTATCTTTGATG | BC012697           |

Notes: All genes were generated against sequences for *Mus musculus*

<sup>‡</sup>Ppif primer sequence from Lam, CK et al *PNAS* 2015
